# Supplementary material for: Primary and secondary anti-tuberculosis drug resistance in Hitossa District of Arsi Zone, Oromia Regional State, Central Ethiopia
Source: BMC Public Health. 2016 Jul 18;16:593. doi: 10.1186/s12889-016-3210-y (PMC4950499; doi:10.1186/s12889-016-3210-y)
Supplement: Additional file 2: — Dataset supporting conclusions of the study on primary and secondary MDR-TB of Hitossa District of Arsi Zone, 2016, submitted to BMC public health using excel software. (CSV 22 kb) [file 12889_2016_3210_MOESM2_ESM.csv]

Patient_ID	HH_ID	Name_of_Kebele	Name_of_zone	houshold_member_id	verbal_concent	oral_and_written_concent	residency_status	date_of_visit_day	date_of_visit__month	date_of_visit__year	Age_CAT	Sex	MaritalStatus	Residence	EducLevel	RoomShare	Occup	Religion	Ethn	SmokingFreq	Cough	duration_cough__days	NightSweat	Wt_Loss	Fever	ChestPain	BloodySputum	CervicalGland	screening_resultst_visit	PrevTBDx_ok	SmearSpotResult	CultureResult	DST_Resistant_MONO	DST_Resistant_DUAL	DST_Resistant_THREEandABOVE	ANYDR_TB	MDR_TB
44	212	Boru Chilalo	Naga Umata	3	Yes	Yes	Permanent	5	5	2014	15-24	Male	Single	Rural	Literate	No	Indoor work	Orthodox Christian	Oromo	NEVER	Yes		Yes	No	No	Yes	No	No	Positive	Yes	Positive	Positive		INH & Streptomycin		Yes	No
96	662	Boru Chilalo	Gora	2	Yes	Yes	Permanent	3	5	2013	25-34	Female	Married	Urban	Literate	No	Outdoor work	Orthodox Christian	Oromo	NEVER	Yes		Yes	Yes	Yes	Yes	Yes	No	Positive	No	Positive	Positive				No	No
106	406	Boru Chilalo	Naga Umata	1	Yes	Yes	Permanent	28	11	2014	25-34	Male	Married	Rural	Literate	No	Outdoor work	Muslim	Oromo	DAILY	Yes		No	No	No	No	No	No	Positive	No	Positive	Positive				No	No
109	10	Boru Chilalo	Naga Umata	2	Yes	Yes	Permanent	3	11	2014	15-24	Female	Married	Urban	Illiterate	No	Outdoor work	Muslim	Amhara	NEVER	Yes		Yes	No	Yes	No	No	No	Positive	No	Positive	Positive				No	No
127	285	Boru Chilalo	Naga Umata	1	Yes	Yes	Permanent	2	5	2013	>=45	Male	Married	Urban	Literate	No	Outdoor work	Orthodox Christian	Amhara	NEVER	No		Yes	No	Yes	Yes	No	No	Positive	No	Positive	Positive				No	No
131	67	Boru Jawi	Ketena 01	1	Yes	Yes	Permanent	11	12	2014	>=45	Male	Single	Urban	Literate	Yes	Outdoor work	Orthodox Christian	Amhara	DAILY	Yes		No	Yes	Yes	No	Yes	No	Positive	Yes	Positive	Positive	Streptomycin			Yes	No
139	162	Boru Jawi	Ketena 01	2	Yes	Yes	Permanent	14	6	2014	35-44	Female	Married	Urban	Illiterate	Yes	Indoor work	Muslim	Gurage	NEVER	Yes		Yes	No	No	Yes	Yes	No	Positive	Yes	Positive	Positive			INH, Rifampicin , Ethambutol & Streptomycin	Yes	Yes
155	223	Boru Jawi	Ketena 01	2	Yes	Yes	Permanent	13	6	2014	35-44	Female	Married	Urban	Literate	No	Outdoor work	Orthodox Christian	Oromo	NEVER	Yes		Yes	No	Yes	Yes	Yes	No	Positive	No	Positive	Positive			INH , Ethambutol & Streptomycin	Yes	Yes
190	870	Eteya	Ketena 1	1	Yes	Yes	Permanent	3	11	2014	15-24	Male	Married	Urban	Literate	No	Indoor work	Orthodox Christian	Oromo	NEVER	Yes	15	No	No	Yes	No	Yes	No	Positive	No	Positive	Positive				No	No
204	480	Eteya	Ketena 1	1	Yes	Yes	Permanent	3	5	2014	25-34	Male	Married	Urban	Literate	No	Outdoor work	Muslim	Oromo	NEVER	Yes		Yes	No	No	Yes	Yes	No	Positive	No	Positive	Positive		INH & Rifampicin		Yes	No
207	342	Gonde Finchama	Tado Gonde	4	Yes	Yes	Permanent	4	5	2013	15-24	Female	Single	Rural	Literate	No	Outdoor work	Muslim	Oromo	NEVER	Yes		Yes	No	Yes	Yes	Yes	No	Positive	No	Positive	Positive				No	No
222	1003	Eteya	Ketena 1	1	Yes	Yes	Permanent	8	5	2013	>=45	Male	Single	Urban	Illiterate	No	Indoor work	Orthodox Christian	Oromo	NEVER	Yes	15	Yes	No	No	No	Yes	No	Positive	No	Positive	Positive				No	No
341	109	Boru Jawi	Ketena 01	4	Yes	Yes	Permanent	7	11	2014	15-24	Male	Single	Urban	Literate	No	Outdoor work	Orthodox Christian	Amhara	NEVER	Yes		Yes	No	Yes	Yes	Yes	No	Positive	No	Positive	Positive	INH			Yes	No
383	607	Boru Chilalo	Gora	2	Yes	Yes	Permanent	26	11	2014	>=45	Female	Married	Rural	Literate	No	Indoor work	Orthodox Christian	Amhara	NEVER	Yes		Yes	Yes	No	Yes	Yes	No	Positive	No	Positive	Positive				No	No
440	67	Dabaya Adare	Dabaya	1	Yes	Yes	Permanent	26	5	2013	>=45	Male	Married	Rural	Literate	No	Outdoor work	Orthodox Christian	Amhara	NEVER	Yes		Yes	No	Yes	Yes	Yes	No	Positive	No	Positive	Positive				No	No
472	638	Eteya	Ketena 1	1	Yes	Yes	Permanent	3	11	2014	15-24	Male	Widowed	Urban	Illiterate	No	Indoor work	Orthodox Christian	Amhara	NEVER	Yes		No	No	No	No	No	No	Positive	No	Positive	Positive				No	No
508	1925	Sibu Abadir	Sibu	2	Yes	Yes	Permanent	1	11	2014	35-44	Female	Married	Rural	Illiterate	Yes	Indoor work	Orthodox Christian	Oromo	NEVER	Yes		Yes	Yes	No	No	No	No	Positive	Yes	Positive	Positive				No	No
657	528	Sibu Abadir	Duftu	1	Yes	Yes	Permanent	2	11	2014	25-34	Female	Single	Rural	Illiterate	No	Outdoor work	Muslim	Oromo	NEVER	Yes		Yes	Yes	Yes	Yes	Yes	No	Positive	No	Positive	Positive				No	No
687	1362	Sibu Abadir	Kalata	1	Yes	Yes	Permanent	29	11	2014	35-44	Male	Married	Urban	Illiterate	No	Outdoor work	Orthodox Christian	Oromo	NEVER	Yes		No	Yes	No	Yes	No	No	Positive	No	Positive	Positive				No	No
696	2100	Sibu Abadir	Sibu	3	Yes	Yes	Permanent	1	11	2014	25-34	Male	Married	Rural	Illiterate	No	Outdoor work	Orthodox Christian	Oromo	NEVER	Yes		Yes	No	Yes	No	No	Yes	Positive	No	Positive	Positive				No	No
729	1536	Boru Jawi	Ketena 01	1	Yes	Yes	Permanent	1	11	2014	15-24	Female	Single	Urban	Illiterate	Yes	Indoor work	Orthodox Christian	Oromo	NEVER	Yes		Yes	No	No	No	No	No	Positive	No	Positive	Positive				No	No
741	348	Jawi Chilalo	Lafo	1	Yes	Yes	Permanent	26	11	2014	25-34	Female	Widowed	Rural	Illiterate	Yes	Indoor work	Muslim	Oromo	NEVER	Yes		No	Yes	Yes	Yes	No	No	Positive	No	Positive	Positive				No	No
758	3	Jawi Chilalo	Lafo	2	Yes	Yes	Permanent	7	5	2014	25-34	Male	Married	Rural	Illiterate	No	Indoor work	Muslim	Oromo	DAILY	No		Yes	No	Yes	No	No	No	Positive	Yes	Positive	Positive		Rifampicin & Streptomycin		Yes	No
826	317	Daya Debaso	Dabbaso	1	Yes	Yes	Permanent	12	5	2014	25-34	Male	Married	Urban	Illiterate	Yes	Outdoor work	Orthodox Christian	Oromo	NEVER	Yes		Yes	Yes	Yes	Yes	No	No	Positive	No	Positive	Positive	Streptomycin			Yes	No
840	80	Daya Debaso	Dodota	1	Yes	Yes	Permanent	8	11	2014	15-24	Female	Married	Urban	Illiterate	Yes	Outdoor work	Orthodox Christian	Oromo	NEVER	Yes		Yes	Yes	No	Yes	Yes	No	Positive	No	Positive	Positive	INH			Yes	No
866	134	Tado Laman	Tado	2	Yes	Yes	Permanent	3	11	2014	35-44	Female	Married	Rural	Illiterate	No	Indoor work	Muslim	Oromo	NEVER	Yes		Yes	No	Yes	Yes	Yes	No	Positive	No	Positive	Positive				No	No
912	289	Hate Handode	Handode	2	Yes	Yes	Permanent	5	11	2014	15-24	Female	Married	Rural	Illiterate	Yes	Indoor work	Muslim	Oromo	NEVER	Yes		Yes	No	Yes	Yes	Yes	No	Positive	Yes	Positive	Positive				No	No
954	770	Oda Jila	Zone 1	1	Yes	Yes	Permanent	23	5	2013	>=45	Male	Married	Rural	Illiterate	Yes	Outdoor work	Orthodox Christian	Oromo	NEVER	Yes		Yes	Yes	Yes	Yes	Yes	No	Positive	Yes	Positive	Positive				No	No
980	368	Anole	Ilala Gnaro	2	Yes	Yes	Permanent	23	5	2013	35-44	Female	Married	Urban	Illiterate	No	Indoor work	Muslim	Oromo	NEVER	Yes		Yes	No	Yes	No	Yes	No	Positive	Yes	Positive	Positive				No	No
989	803	Eteya	Ketena 1	1	Yes	Yes	Permanent	10	6	2014	15-24	Male	Married	Urban	Literate	Yes	Indoor work	Orthodox Christian	Oromo	NEVER	No		Yes	Yes	Yes	Yes	Yes	No	Positive	Yes	Positive	Positive			INH , Rifampicin & Streptomycin	Yes	Yes
1053	123	Jango Kilisa	Jango	3	Yes	Yes	Permanent	4	5	2013	15-24	Female	Single	Urban	Literate	Yes	Outdoor work	Orthodox Christian	Oromo	NEVER	Yes		Yes	No	Yes	Yes	Yes	No	Positive	No	Positive	Positive				No	No
1077	98	Jango Kilisa	Jango	4	Yes	Yes	Permanent	31	5	2013	25-34	Female	Married	Rural	Illiterate	No	Indoor work	Muslim	Oromo	DAILY	Yes		No	Yes	Yes	No	No	No	Positive	Yes	Positive	Positive				No	No
1084	713	Eteya	Ketena 1	1	Yes	Yes	Permanent	2	11	2014	>=45	Female	Married	Urban	Literate	No	Indoor work	Orthodox Christian	Oromo	NEVER	Yes		Yes	Yes	Yes	Yes	Yes	No	Positive	No	Positive	Positive				No	No
1094	970	Eteya	Ketena 1	1	Yes	Yes	Permanent	4	5	2014	15-24	Male	Single	Rural	Illiterate	No	Indoor work	Muslim	Oromo	NEVER	Yes		Yes	Yes	Yes	Yes	Yes	No	Positive	No	Positive	Positive		INH & Streptomycin		Yes	No
1151	555	Eteya	Ketena 5	3	Yes	Yes	Permanent	12	6	2014	15-24	Female	Single	Urban	Literate	Yes	Indoor work	Muslim	Oromo	NEVER	Yes		Yes	No	No	No	Yes	No	Positive	Yes	Positive	Positive			INH , Rifampicin & Streptomycin	Yes	Yes
1156	437	Eteya	Ketena 2	1	Yes	Yes	Permanent	15	6	2013	>=45	Male	Married	Urban	Literate	No	Outdoor work	Muslim	Oromo	NEVER	Yes		Yes	No	Yes	Yes	No	No	Positive	No	Positive	Positive				No	No
1157	925	Sibu Abadir	Kalata	3	Yes	Yes	Permanent	23	5	2013	15-24	Male	Married	Rural	Literate	Yes	Outdoor work	Orthodox Christian	Oromo	NEVER	Yes		Yes	Yes	Yes	Yes	Yes	No	Positive	No	Positive	Positive				No	No
1209	1403	Sibu Abadir	Kalata	1	Yes	Yes	Permanent	15	6	2013	15-24	Male	Single	Rural	Literate	Yes	Outdoor work	Muslim	Oromo	NEVER	Yes		Yes	Yes	Yes	Yes	No	No	Positive	No	Positive	Positive				No	No
1247	963	Eteya	Ketena 1	1	Yes	Yes	Permanent	6	5	2014	25-34	Male	Single	Rural	Illiterate	Yes	Indoor work	Orthodox Christian	Oromo	MONTHLY	Yes		No	Yes	No	Yes	Yes	No	Positive	No	Positive	Positive		Rifampicin & Streptomycin		Yes	No
1291	44	Eteya	Ketena 1	1	Yes	Yes	Permanent	11	12	2014	25-34	Female	Married	Urban	Illiterate	Yes	Outdoor work	Orthodox Christian	Oromo	NEVER	Yes		Yes	Yes	Yes	Yes	Yes	No	Positive	No	Positive	Positive	Streptomycin			Yes	No
1298	367	Eteya	Ketena 2	1	Yes	Yes	Permanent	3	11	2014	>=45	Male	Married	Urban	Illiterate	No	Outdoor work	Orthodox Christian	Oromo	NEVER	Yes	15	Yes	Yes	No	Yes	No	No	Positive	Yes	Positive	Positive				No	No
1497	137	Shaki Sharara	Shaki	3	Yes	Yes	Permanent	2	11	2014	15-24	Male	Single	Rural	Literate	No	Indoor work	Muslim	Oromo	DAILY	Yes		Yes	Yes	Yes	Yes	No	No	Positive	No	Positive	Positive				No	No
1510	92	Shaki Sharara	Shaki	1	Yes	Yes	Permanent	13	5	2014	35-44	Female	Widowed	Urban	Illiterate	No	Outdoor work	Muslim	Oromo	NEVER	Yes		Yes	Yes	Yes	Yes	No	No	Positive	Yes	Positive	Positive	Ethambutol			Yes	No
1517	157	Shaki Sharara	Shaki	4	Yes	Yes	Permanent	8	5	2013	15-24	Male	Single	Rural	Literate	No	Indoor work	Muslim	Oromo	DAILY	Yes		Yes	Yes	No	Yes	Yes	No	Positive	No	Positive	Positive				No	No
1539	341	Shaki Sharara	Shaki	6	Yes	Yes	Permanent	8	5	2013	35-44	Female	Married	Rural	Illiterate	Yes	Indoor work	Muslim	Oromo	NEVER	Yes		Yes	Yes	Yes	Yes	No	No	Positive	No	Positive	Positive				No	No
1570	393	Gonde Finchama	Badoso	2	Yes	Yes	Permanent	7	5	2013	25-34	Female	Married	Rural	Literate	No	Indoor work	Muslim	Oromo	NEVER	No		No	No	No	No	Yes	No	Positive	No	Positive	Positive				No	No
1595	103	Sero Ankato	Badosa Bararti	2	Yes	Yes	Permanent	5	11	2014	35-44	Female	Married	Urban	Illiterate	No	Outdoor work	Muslim	Oromo	DAILY	Yes		Yes	Yes	Yes	Yes	Yes	No	Positive	Yes	Positive	Positive	INH			Yes	No
1692	348	Sero Ankato	Nunu Ankato	1	Yes	Yes	Permanent	30	5	2013	15-24	Female	Married	Rural	Illiterate	Yes	Indoor work	Muslim	Oromo	NEVER	Yes		Yes	Yes	Yes	Yes	No	No	Positive	No	Positive	Positive				No	No
1805	524	Eteya	Ketena 1	2	Yes	Yes	Permanent	12	6	2013	>=45	Female	Married	Urban	Illiterate	No	Indoor work	Muslim	Oromo	NEVER	Yes		Yes	No	Yes	Yes	No	No	Positive	No	Positive	Positive				No	No
1868	19	Anole	Ilala Gnaro	1	Yes	Yes	Permanent	9	6	2013	>=45	Female	Married	Rural	Illiterate	Yes	Outdoor work	Muslim	Oromo	NEVER	Yes		Yes	Yes	Yes	Yes	Yes	No	Positive	No	Positive	Positive				No	No
2474	398	Sero Ankato	Nunu Ankato	1	Yes	Yes	Permanent	10	6	2013	35-44	Male	Married	Urban	Illiterate	No	Outdoor work	Muslim	Oromo	NEVER	Yes		Yes	No	Yes	No	No	No	Positive	No	Positive	Positive				No	No
3974	66	Boru Lencha	Gulale Hidi Biro	1	Yes	Yes	Permanent	2	5	2013	35-44	Male	Married	Rural	Literate	No	Outdoor work	Orthodox Christian	Oromo	NEVER	Yes	15	No	No	No	No	No	No	Positive	No	Positive	Positive				No	No
4311	260	Daya Debaso	Dabbaso	1	Yes	Yes	Permanent	26	5	2013	>=45	Female	Divorced	Rural	Illiterate	No	Indoor work	Orthodox Christian	Oromo	NEVER	Yes		No	Yes	Yes	No	No	No	Positive	No	Positive	Positive				No	No
4352	253	Daya Debaso	Dabbaso	1	Yes	Yes	Permanent	3	11	2014	15-24	Female	Married	Urban	Literate	Yes	Indoor work	Orthodox Christian	Oromo	NEVER	Yes		No	No	No	Yes	No	No	Positive	No	Positive	Positive				No	No
4459	660	Dawe Guticha	Guticha	1	Yes	Yes	Permanent	10	6	2013	15-24	Male	Married	Urban	Illiterate	No	Outdoor work	Muslim	Oromo	NEVER	Yes		No	No	Yes	No	No	No	Positive	Yes	Positive	Positive				No	No
4946	102	Dawe Guticha	Dawe	1	Yes	Yes	Permanent	2	11	2014	15-24	Male	Single	Rural	Literate	Yes	Outdoor work	Muslim	Oromo	NEVER	Yes		Yes	No	Yes	Yes	Yes	No	Positive	No	Positive	Positive				No	No
5186	282	Tado Laman	Tado	1	Yes	Yes	Permanent	25	11	2014	>=45	Female	Widowed	Urban	Illiterate	No	Outdoor work	Muslim	Oromo	NEVER	Yes		Yes	No	Yes	Yes	No	No	Positive	No	Positive	Positive				No	No
5296	130	Tado Laman	Tado	1	Yes	Yes	Permanent	3	11	2014	15-24	Male	Married	Urban	Illiterate	No	Outdoor work	Muslim	Oromo	DAILY	Yes	15	Yes	No	Yes	Yes	Yes	No	Positive	No	Positive	Positive				No	No
5431	44	Tado Laman	Tado	1	Yes	Yes	Permanent	17	6	2013	25-34	Female	Divorced	Urban	Literate	Yes	Outdoor work	Orthodox Christian	Oromo	DAILY	Yes		Yes	Yes	Yes	Yes	No	No	Positive	No	Positive	Positive				No	No
5535	55	Jango Kilisa	Kilisa	1	Yes	Yes	Permanent	12	6	2013	15-24	Male	Single	Rural	Illiterate	Yes	Indoor work	Muslim	Oromo	NEVER	Yes		Yes	Yes	No	Yes	No	No	Positive	No	Positive	Positive				No	No
5929	218	Guri Debula	Debula Bilu	1	Yes	Yes	Permanent	2	11	2014	35-44	Female	Married	Urban	Illiterate	No	Indoor work	Muslim	Oromo	NEVER	Yes		No	No	No	No	No	No	Positive	Yes	Positive	Positive				No	No
5933	147	Guri Debula	Debula Bilu	1	Yes	Yes	Permanent	7	5	2014	35-44	Male	Married	Rural	Illiterate	No	Outdoor work	Muslim	Oromo	NEVER	Yes		No	No	Yes	No	No	No	Positive	No	Positive	Positive		Ethambutol & Streptomycin		Yes	No
6106	112	Guri Debula	Debula Bilu	1	Yes	Yes	Permanent	26	11	2014	15-24	Male	Married	Rural	Illiterate	No	Outdoor work	Muslim	Oromo	NEVER	Yes		No	No	No	No	No	No	Positive	No	Positive	Positive				No	No
6275	104	Shaki Sharara	Shaki	1	Yes	Yes	Permanent	3	11	2014	15-24	Male	Single	Rural	Literate	No	Outdoor work	Muslim	Oromo	NEVER	Yes	15	Yes	Yes	No	No	No	No	Positive	No	Positive	Positive				No	No
6461	260	Shaki Sharara	Shaki	1	Yes	Yes	Permanent	9	11	2014	15-24	Male	Single	Urban	Literate	Yes	Outdoor work	Muslim	Oromo	DAILY	Yes		Yes	Yes	No	No	No	No	Positive	Yes	Positive	Positive	Streptomycin			Yes	No
6889	355	Anole	Ilala Gnaro	1	Yes	Yes	Permanent	11	6	2013	15-24	Male	Married	Rural	Illiterate	No	Outdoor work	Muslim	Oromo	DAILY	Yes		No	Yes	Yes	No	Yes	No	Positive	No	Positive	Positive				No	No
7086	68	Tero Moye	Gashole Side	1	Yes	Yes	Permanent	1	11	2014	25-34	Male	Married	Rural	Illiterate	No	Outdoor work	Muslim	Oromo	NEVER	Yes		Yes	No	No	No	No	No	Positive	No	Positive	Positive				No	No
7278	242	Tero Moye	Adano Tatesa	1	Yes	Yes	Permanent	11	6	2014	15-24	Male	Single	Rural	Illiterate	No	Indoor work	Muslim	Oromo	NEVER	Yes		Yes	Yes	Yes	No	No	No	Positive	No	Positive	Positive			INH , Rifampicin & Streptomycin	Yes	Yes
8211	291	Boru Chilalo	Naga Umata	1	Yes	Yes	Permanent	3	11	2014	>=45	Female	Married	Rural	Illiterate	No	Outdoor work	Muslim	Oromo	NEVER	Yes	15	Yes	No	Yes	No	No	No	Positive	No	Positive	Positive				No	No
8998	117	Oda Jila	Zone 1	1	Yes	Yes	Permanent	3	11	2014	>=45	Male	Single	Rural	Illiterate	Yes	Outdoor work	Orthodox Christian	Oromo	NEVER	Yes	30	Yes	Yes	Yes	Yes	Yes	No	Positive	No	Positive	Positive				No	No
9612	590	Gonde Finchama	Badoso	1	Yes	Yes	Permanent	24	11	2014	15-24	Male	Married	Rural	Literate	No	Outdoor work	Muslim	Oromo	NEVER	Yes		Yes	Yes	Yes	Yes	Yes	No	Positive	No	Positive	Positive				No	No
9677	316	Gonde Finchama	Badoso	1	Yes	Yes	Permanent	27	11	2014	35-44	Female	Married	Rural	Illiterate	Yes	Indoor work	Muslim	Oromo	NEVER	Yes		Yes	No	Yes	Yes	Yes	No	Positive	No	Positive	Positive				No	No
9718	207	Gonde Finchama	Badoso	1	Yes	Yes	Permanent	3	11	2014	35-44	Male	Married	Rural	Literate	Yes	Outdoor work	Orthodox Christian	Oromo	DAILY	Yes		Yes	Yes	No	Yes	No	No	Positive	No	Positive	Positive				No	No
9734	317	Gonde Finchama	Badoso	1	Yes	Yes	Permanent	4	11	2014	35-44	Male	Married	Urban	Literate	No	Outdoor work	Muslim	Oromo	NEVER	Yes	14	Yes	No	Yes	Yes	Yes	No	Positive	No	Positive	Positive				No	No
9816	126	Gonde Finchama	Badoso	1	Yes	Yes	Permanent	6	5	2014	>=45	Male	Married	Rural	Illiterate	No	Outdoor work	Muslim	Oromo	NEVER	Yes		No	No	No	No	No	No	Positive	No	Positive	Positive		INH & Streptomycin		Yes	No
9915	107	Dabaya Adare	Dabaya	1	Yes	Yes	Permanent	26	5	2013	35-44	Male	Married	Urban	Literate	No	Outdoor work	Orthodox Christian	Amhara	NEVER	No		No	No	No	No	Yes	No	Positive	No	Positive	Positive				No	No
10855	1181	Sibu Abadir	Duftu	1	Yes	Yes	Permanent	3	5	2013	35-44	Female	Married	Urban	Illiterate	Yes	Indoor work	Orthodox Christian	Oromo	NEVER	Yes		No	No	Yes	No	No	Yes	Positive	No	Positive	Positive				No	No
10955	46	Sibu Abadir	Duftu	1	Yes	Yes	Permanent	10	6	2013	35-44	Female	Married	Rural	Literate	Yes	Indoor work	Orthodox Christian	Oromo	NEVER	Yes	3	Yes	Yes	Yes	Yes	No	No	Positive	No	Positive	Positive				No	No
11377	768	Sibu Abadir	Duftu	1	Yes	Yes	Permanent	3	11	2014	35-44	Female	Married	Rural	Illiterate	No	Outdoor work	Orthodox Christian	Oromo	NEVER	Yes		Yes	Yes	Yes	Yes	No	No	Positive	No	Positive	Positive				No	No
11674	1372	Sibu Abadir	Kalata	1	Yes	Yes	Permanent	1	5	2013	35-44	Male	Married	Urban	Literate	No	Outdoor work	Muslim	Oromo	DAILY	Yes		Yes	No	No	No	No	No	Positive	No	Positive	Positive				No	No
11753	1379	Sibu Abadir	Kalata	1	Yes	Yes	Permanent	7	5	2013	15-24	Male	Single	Rural	Illiterate	Yes	Outdoor work	Muslim	Oromo	NEVER	Yes		Yes	Yes	Yes	No	No	No	Positive	No	Positive	Positive				No	No
11866	849	Sibu Abadir	Kalata	1	Yes	Yes	Permanent	21	5	2013	15-24	Female	Married	Rural	Literate	No	Indoor work	Orthodox Christian	Oromo	NEVER	Yes		Yes	No	Yes	Yes	Yes	No	Positive	No	Positive	Positive				No	No
11939	1008	Sibu Abadir	Kalata	1	Yes	Yes	Permanent	3	11	2014	15-24	Male	Single	Rural	Literate	Yes	Outdoor work	Muslim	Oromo	NEVER	No		Yes	No	No	Yes	No	Yes	Positive	No	Positive	Positive				No	No
12158	1037	Sibu Abadir	Kalata	1	Yes	Yes	Permanent	5	5	2014	15-24	Male	Single	Rural	Literate	No	Indoor work	Orthodox Christian	Oromo	DAILY	Yes		No	Yes	Yes	Yes	No	No	Positive	No	Positive	Positive		INH & Streptomycin		Yes	No
12242	242	Harbe	Adamonye	1	Yes	Yes	Permanent	1	11	2014	>=45	Male	Married	Urban	Illiterate	No	Outdoor work	Orthodox Christian	Oromo	NEVER	Yes		Yes	No	Yes	Yes	Yes	No	Positive	No	Positive	Positive				No	No
12286	53	Harbe	Adamonye	1	Yes	Yes	Permanent	29	5	2013	15-24	Male	Married	Urban	Literate	Yes	Outdoor work	Orthodox Christian	Oromo	NEVER	Yes		No	No	No	No	No	No	Positive	No	Positive	Positive				No	No
12439	195	Harbe	Adamonye	1	Yes	Yes	Permanent	1	11	2014	35-44	Male	Married	Rural	Literate	No	Outdoor work	Orthodox Christian	Oromo	NEVER	Yes		No	No	Yes	No	Yes	No	Positive	Yes	Positive	Positive				No	No
13356	236	Eteya	Ketena 1	2	Yes	Yes	Permanent	14	6	2013	25-34	Female	Married	Urban	Literate	Yes	Indoor work	Muslim	Oromo	NEVER	Yes		No	No	No	Yes	No	No	Positive	No	Positive	Positive				No	No
13798	88	Eteya	Ketena 1	2	Yes	Yes	Permanent	3	5	2013	15-24	Female	Married	Urban	Illiterate	No	Indoor work	Muslim	Oromo	NEVER	Yes		Yes	Yes	Yes	Yes	No	No	Positive	No	Positive	Positive				No	No
14013	338	Eteya	Ketena 1	2	Yes	Yes	Permanent	8	5	2013	15-24	Female	Married	Urban	Literate	Yes	Indoor work	Orthodox Christian	Oromo	NEVER	Yes		No	No	Yes	No	No	No	Positive	No	Positive	Positive				No	No
14366	78	Eteya	Ketena 2	2	Yes	Yes	Permanent	1	11	2014	15-24	Female	Married	Urban	Illiterate	Yes	Indoor work	Orthodox Christian	Oromo	NEVER	Yes	30	Yes	Yes	No	No	Yes	No	Positive	No	Positive	Positive				No	No
15568	450	Sero Ankato	Nunu Ankato	2	Yes	Yes	Permanent	1	11	2014	35-44	Male	Married	Rural	Illiterate	No	Outdoor work	Orthodox Christian	Amhara	NEVER	Yes		No	Yes	Yes	Yes	Yes	No	Positive	No	Positive	Positive				No	No
16621	342	Hate Handode	Handode	2	Yes	Yes	Permanent	30	11	2014	>=45	Female	Married	Rural	Illiterate	No	Indoor work	Orthodox Christian	Oromo	DAILY	Yes		No	No	No	No	No	No	Positive	No	Positive	Positive				No	No
17092	205	Boru Lencha	Gulale Hidi Biro	2	Yes	Yes	Permanent	3	5	2014	15-24	Female	Married	Urban	Literate	Yes	Indoor work	Orthodox Christian	Oromo	NEVER	Yes		No	No	No	No	No	No	Positive	No	Positive	Positive		INH & Ethambutol		Yes	No
17590	645	Dawe Guticha	Guticha	2	Yes	Yes	Permanent	15	6	2013	15-24	Female	Married	Rural	Literate	No	Outdoor work	Muslim	Oromo	NEVER	Yes		No	No	Yes	No	Yes	No	Positive	No	Positive	Positive				No	No
18179	216	Tado Laman	Tado	2	Yes	Yes	Permanent	3	5	2014	35-44	Female	Married	Rural	Illiterate	No	Indoor work	Orthodox Christian	Oromo	NEVER	Yes		Yes	No	Yes	Yes	Yes	No	Positive	Yes	Positive	Positive		INH & Rifampicin		Yes	No
18730	174	Jango Kilisa	Jango	2	Yes	Yes	Permanent	9	6	2013	35-44	Female	Married	Urban	Literate	No	Indoor work	Orthodox Christian	Oromo	NEVER	Yes		Yes	Yes	Yes	Yes	No	No	Positive	No	Positive	Positive				No	No
19349	124	Shaki Sharara	Shaki	2	Yes	Yes	Permanent	3	11	2014	35-44	Female	Married	Rural	Literate	No	Indoor work	Muslim	Oromo	NEVER	Yes		Yes	Yes	Yes	Yes	Yes	Yes	Positive	No	Positive	Positive				No	No
19599	130	Anole	Haro Balda	2	Yes	Yes	Permanent	7	5	2014	25-34	Female	Married	Urban	Illiterate	Yes	Outdoor work	Muslim	Oromo	NEVER	Yes		Yes	Yes	Yes	Yes	No	No	Positive	No	Positive	Positive		Rifampicin & Streptomycin		Yes	No
19897	388	Tero Moye	Moye Artu	2	Yes	Yes	Permanent	8	5	2013	35-44	Female	Married	Urban	Literate	No	Outdoor work	Muslim	Oromo	NEVER	Yes	16	No	No	No	Yes	No	No	Positive	No	Positive	Positive				No	No
21268	417	Boru Chilalo	Naga Umata	2	Yes	Yes	Permanent	3	11	2014	25-34	Female	Married	Rural	Literate	No	Indoor work	Orthodox Christian	Oromo	NEVER	Yes		Yes	Yes	Yes	No	No	No	Positive	No	Positive	Positive				No	No
21764	730	Boru Chilalo	Gora	2	Yes	Yes	Permanent	17	6	2013	15-24	Female	Married	Rural	Illiterate	No	Outdoor work	Orthodox Christian	Oromo	NEVER	Yes		No	No	Yes	No	No	No	Positive	No	Positive	Positive				No	No
23045	205	Dabaya Adare	Dabaya	2	Yes	Yes	Permanent	31	5	2013	>=45	Female	Married	Rural	Illiterate	No	Indoor work	Orthodox Christian	Oromo	NEVER	Yes	16	Yes	Yes	Yes	Yes	Yes	No	Positive	No	Positive	Positive				No	No
23094	285	Dabaya Adare	Dabaya	2	Yes	Yes	Permanent	11	6	2013	35-44	Female	Married	Rural	Illiterate	No	Outdoor work	Orthodox Christian	Oromo	NEVER	Yes		Yes	Yes	Yes	Yes	Yes	No	Positive	Yes	Positive	Positive				No	No
23796	692	Sibu Abadir	Duftu	2	Yes	Yes	Permanent	4	11	2014	25-34	Female	Married	Rural	Illiterate	No	Indoor work	Orthodox Christian	Oromo	NEVER	Yes		Yes	No	Yes	No	No	No	Positive	No	Positive	Positive				No	No
25394	103	Harbe	Adamonye	2	Yes	Yes	Permanent	1	11	2014	35-44	Female	Married	Rural	Illiterate	Yes	Indoor work	Orthodox Christian	Amhara	DAILY	Yes		No	No	Yes	No	Yes	No	Positive	Yes	Positive	Positive				No	No
